# Supplementary material
Source: PubMed Central journal article supplement (PMC5745542)

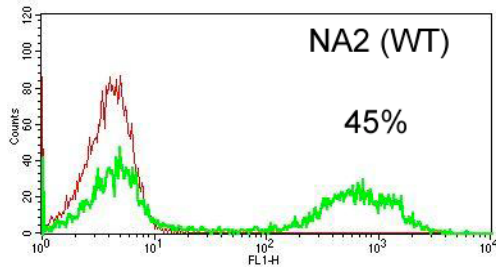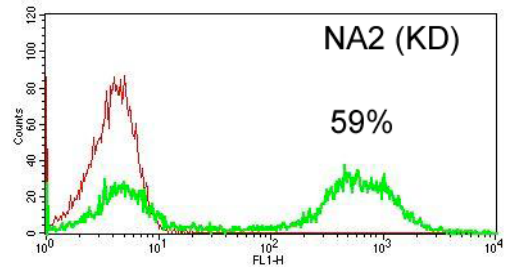

**Supplemental Figure 1**

Supplement: mmc1.pdf [file mmc1.pdf]

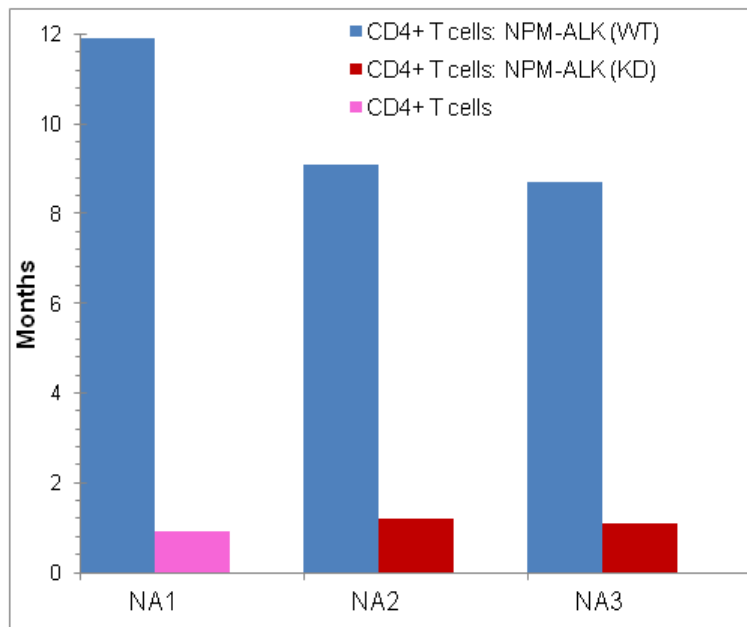

**Supplemental Figure 2**

Supplement: mmc2.pdf [file mmc2.pdf]

### Supplemental Figure 3

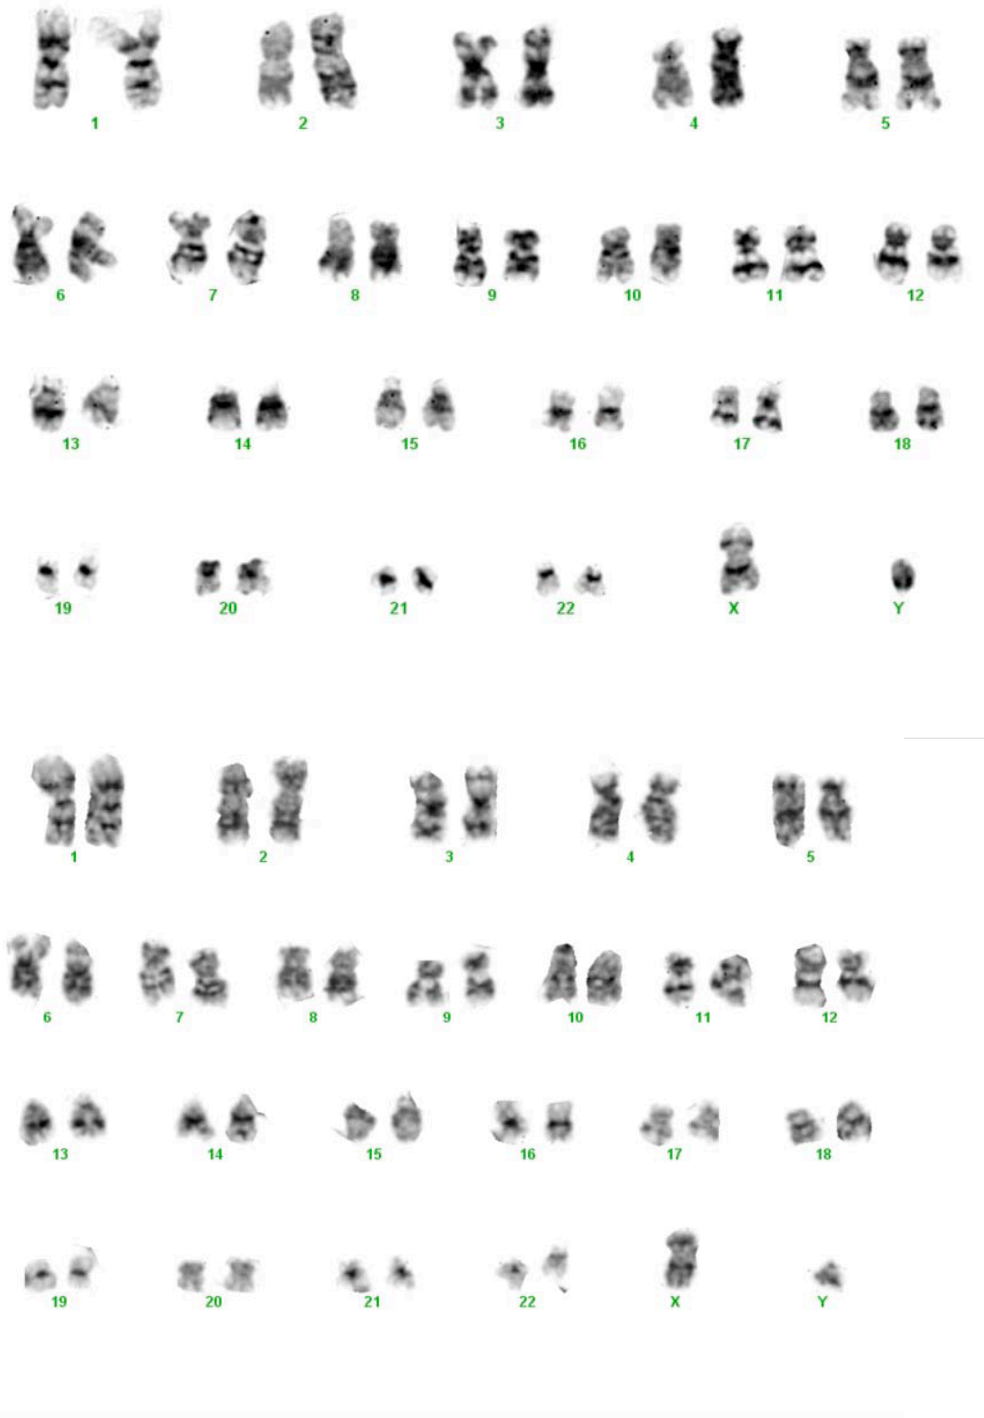

Supplement: mmc3.pdf [file mmc3.pdf]

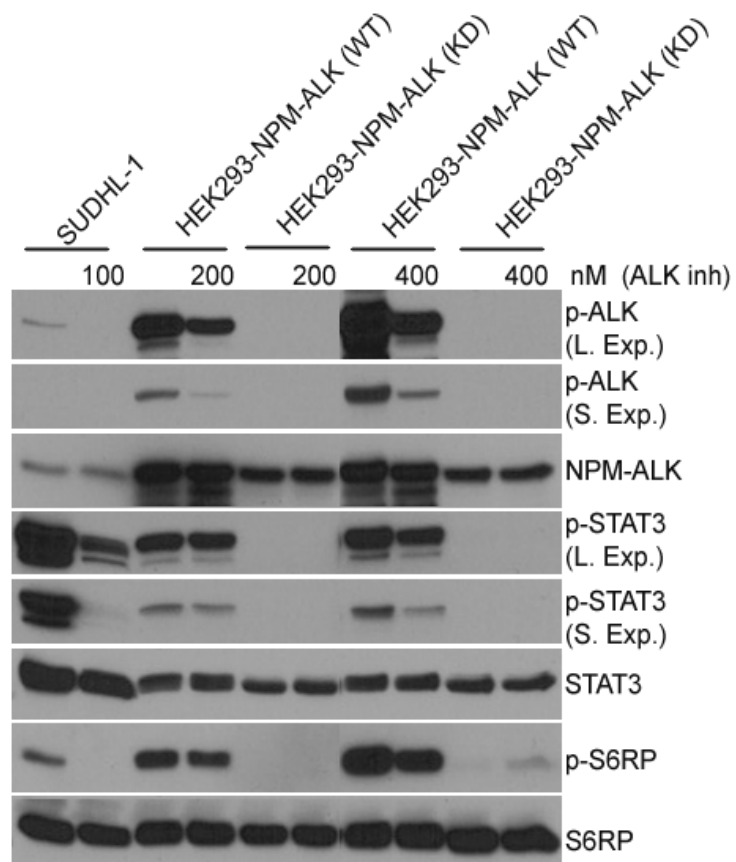

**Supplemental Figure 4**

Supplement: mmc4.pdf [file mmc4.pdf]

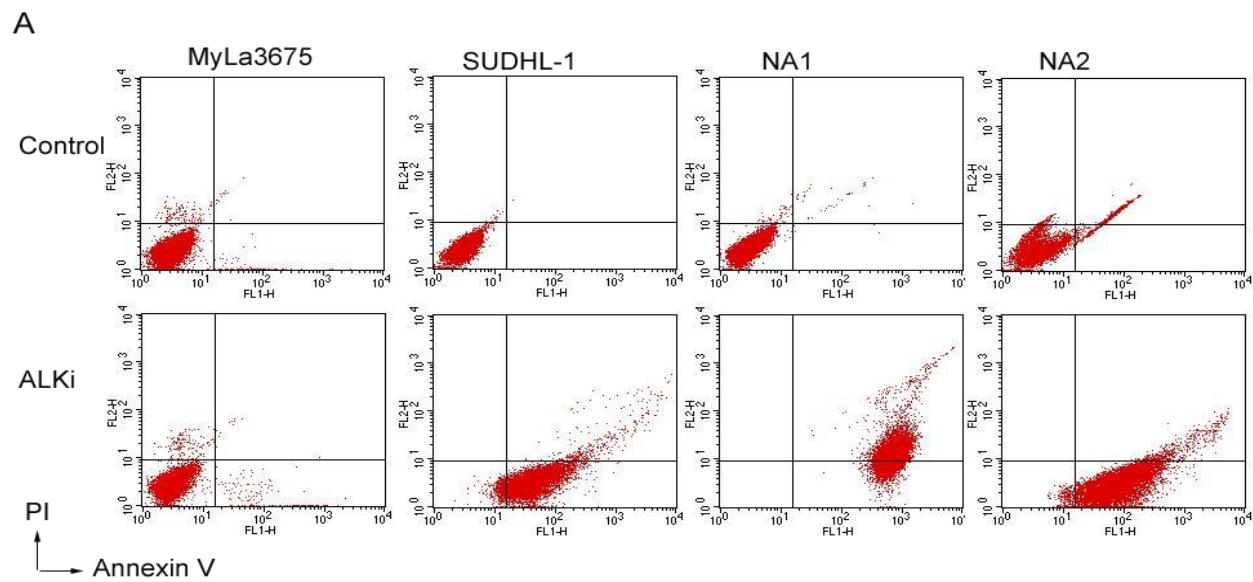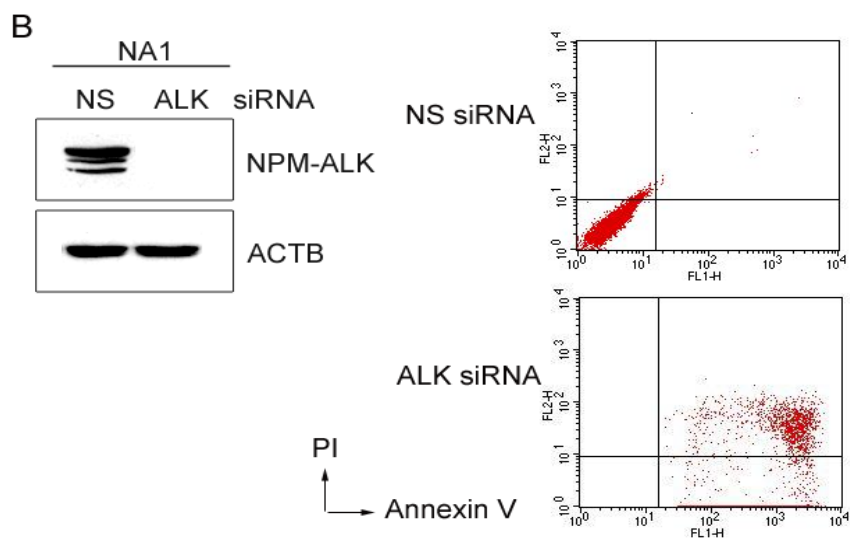

**Supplemental Figure 5**

Supplement: mmc5.pdf [file mmc5.pdf]
